# Supplementary material for: Semisynthetic photoprotein reporters for tracking fast Ca2+ transients
Source: Royal Society of Chemistry journal article supplement (doi:10.1039/c5pp00328h), 2015-10-19
Supplement: c5pp00328h1.pdf [file c5pp00328h1.pdf]

Electronic Supplementary Information for

## **Semisynthetic photoprotein reporters for tracking fast fast Ca<sup>2+</sup> transients**

Natalia P. Malikova,<sup>a</sup> Aren J. Borgdorff<sup>b</sup>, and Eugene S. Vysotski<sup>a,†</sup>

<sup>a</sup>*Photobiology Laboratory, Institute of Biophysics, Russian Academy of Sciences, Siberian Branch, Krasnoyarsk, 660036, Russia;*

<sup>b</sup>*Institut des Neurosciences Alfred Fessard, UPR 3294, Centre National de la Recherche Scientifique, Avenue de la Terrasse, 91198 Gif-sur-Yvette, France*

†Corresponding author:

Fax: +7 (391) 243-3400; Tel: +7 (391) 249-4430;

E-mail: <eugene.vysotski@gmail.com> or <eugene\_vysotski@ibp.ru>

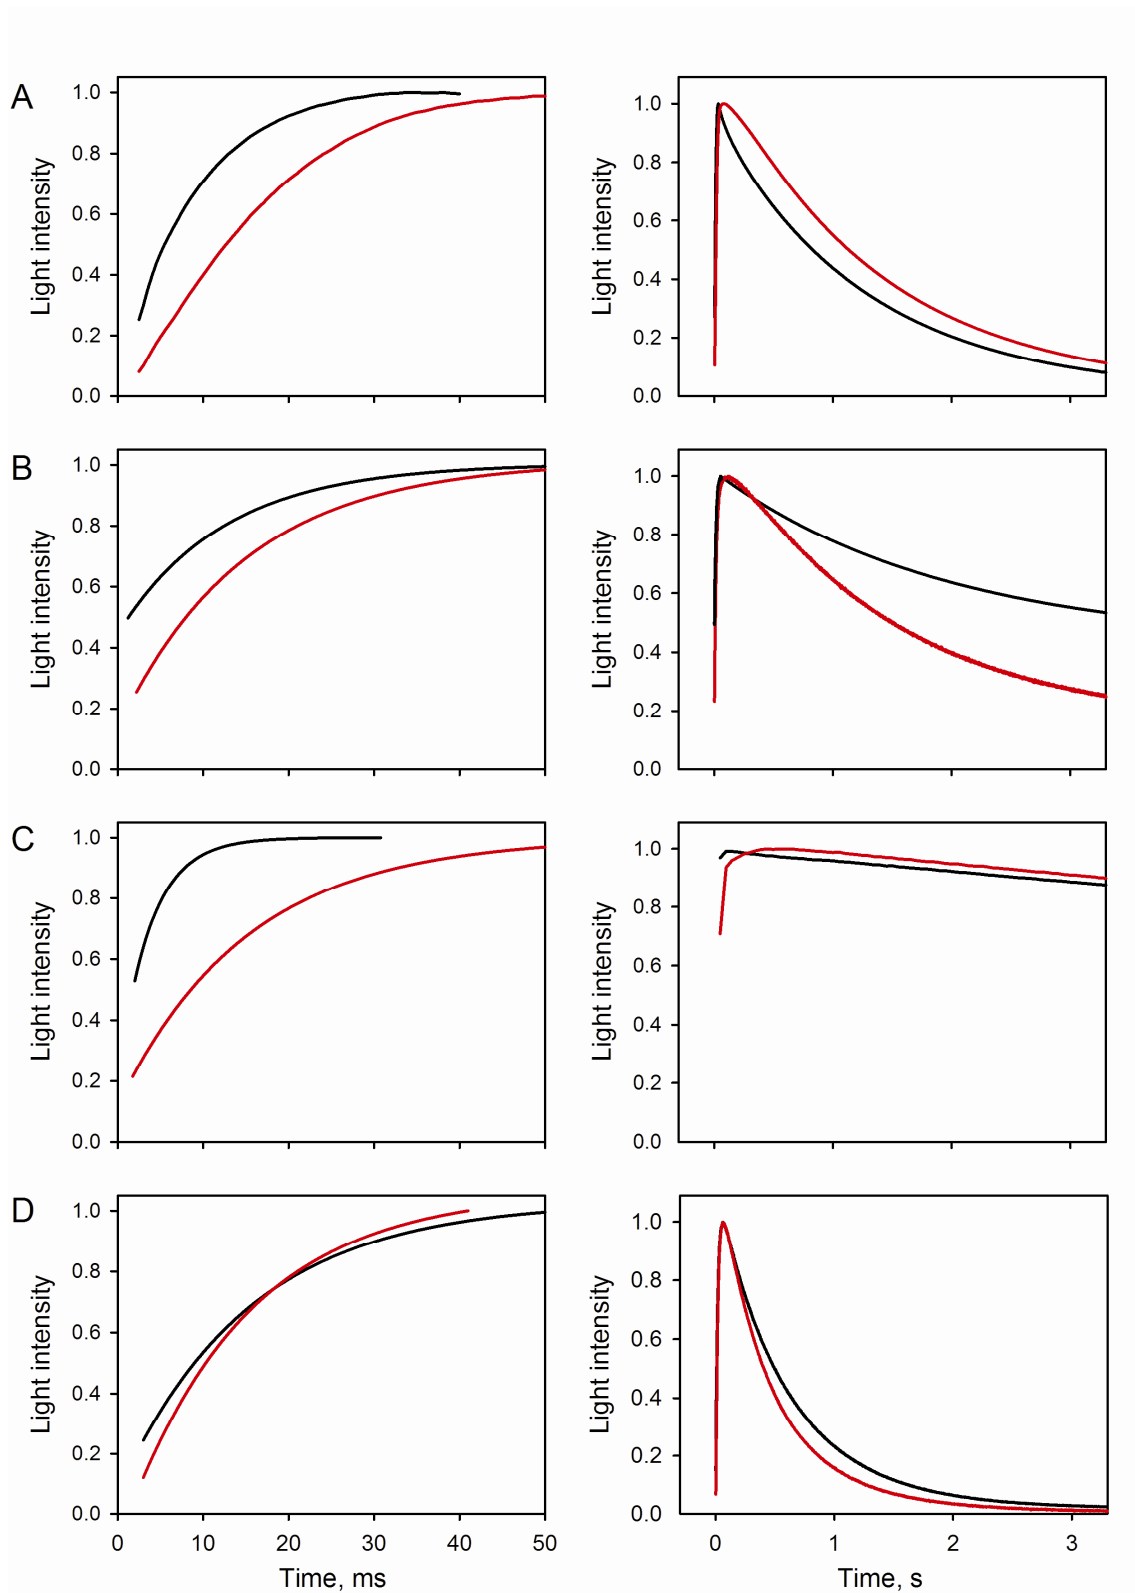

**Figure S1.** Stopped-flow records of the rising phase (left panel) and full-time course (right panel) of luminescence signal for aequorin reconstituted with native CTZ (A), CTZ-*f* (B), CTZ-*i* (C), and CTZ-*hcp* (D) without  $Mg^{2+}$  (black) and with 1 mM  $Mg^{2+}$  (red).

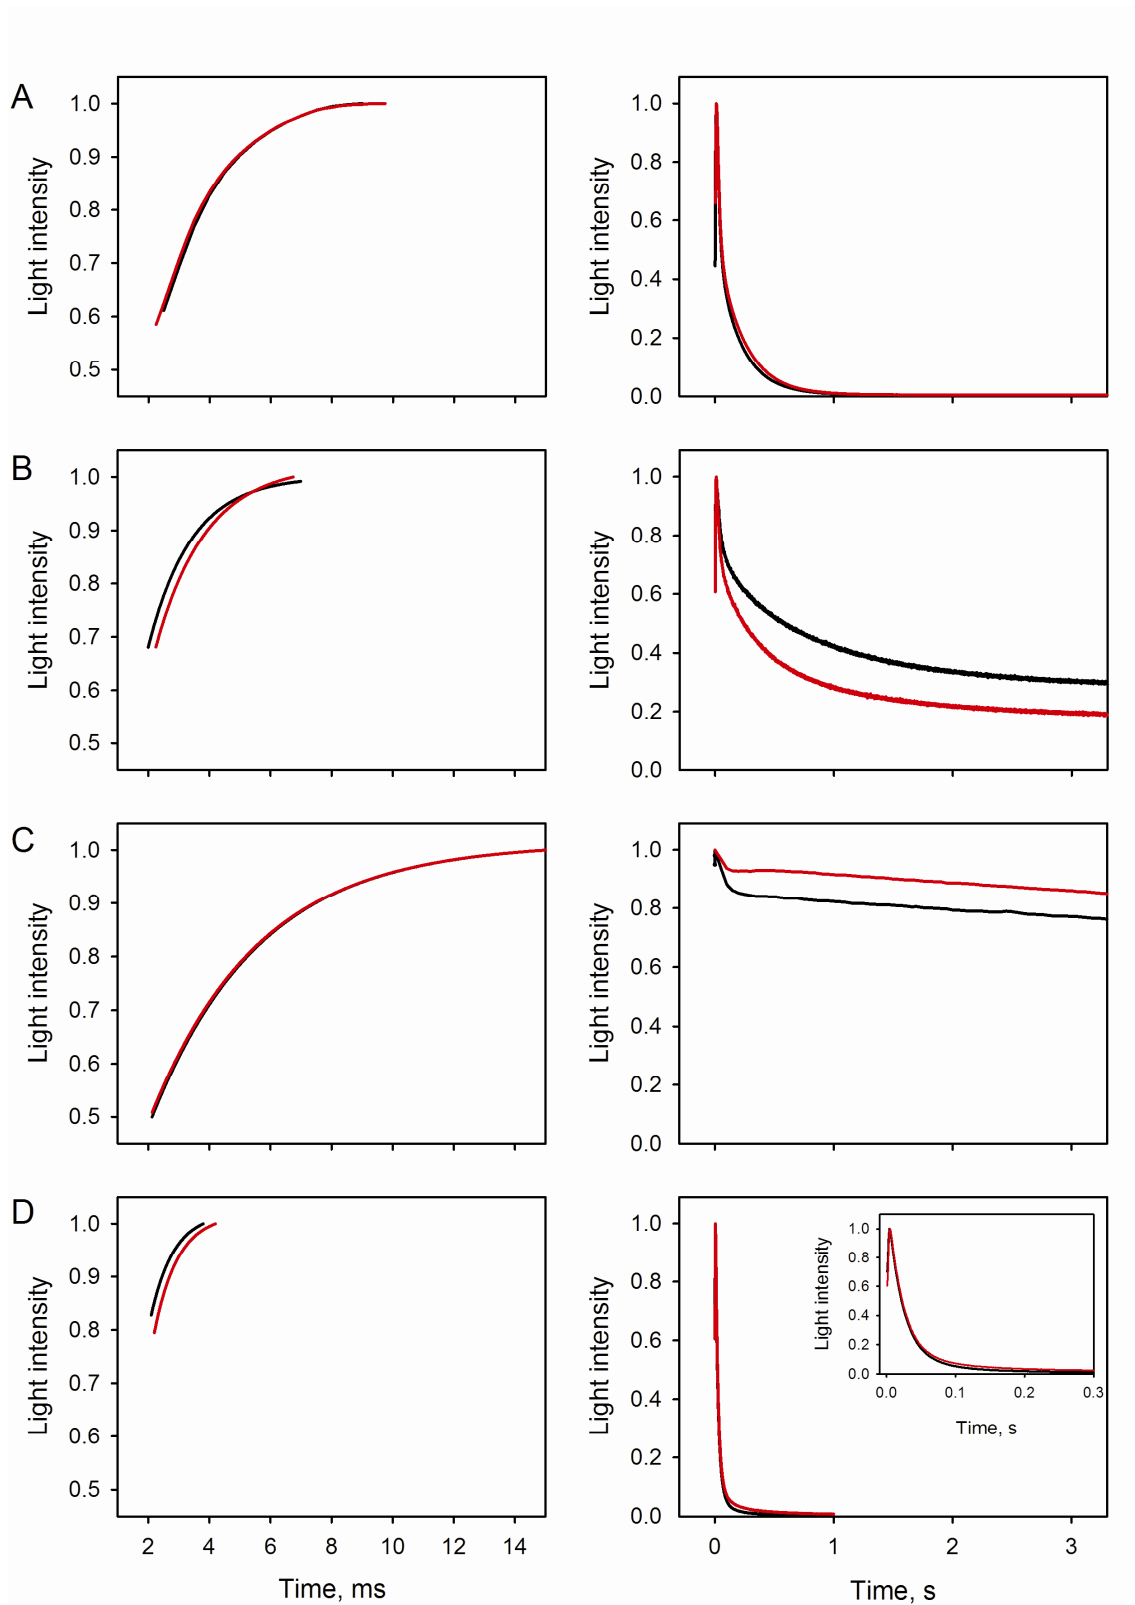

**Figure S2.** Stopped-flow records of the rising phase (left panel) and full-time course (right panel) of luminescence signal for obelin reconstituted with native CTZ (A), CTZ-*f* (B), CTZ-*i* (C), and CTZ-*hcp* (D) without  $Mg^{2+}$  (black) and with 1 mM  $Mg^{2+}$  (red). Inset: Stopped-flow records of the full-time course of luminescence signal for obelin-*hcp* without  $Mg^{2+}$  (black) and with 1 mM  $Mg^{2+}$  (red).

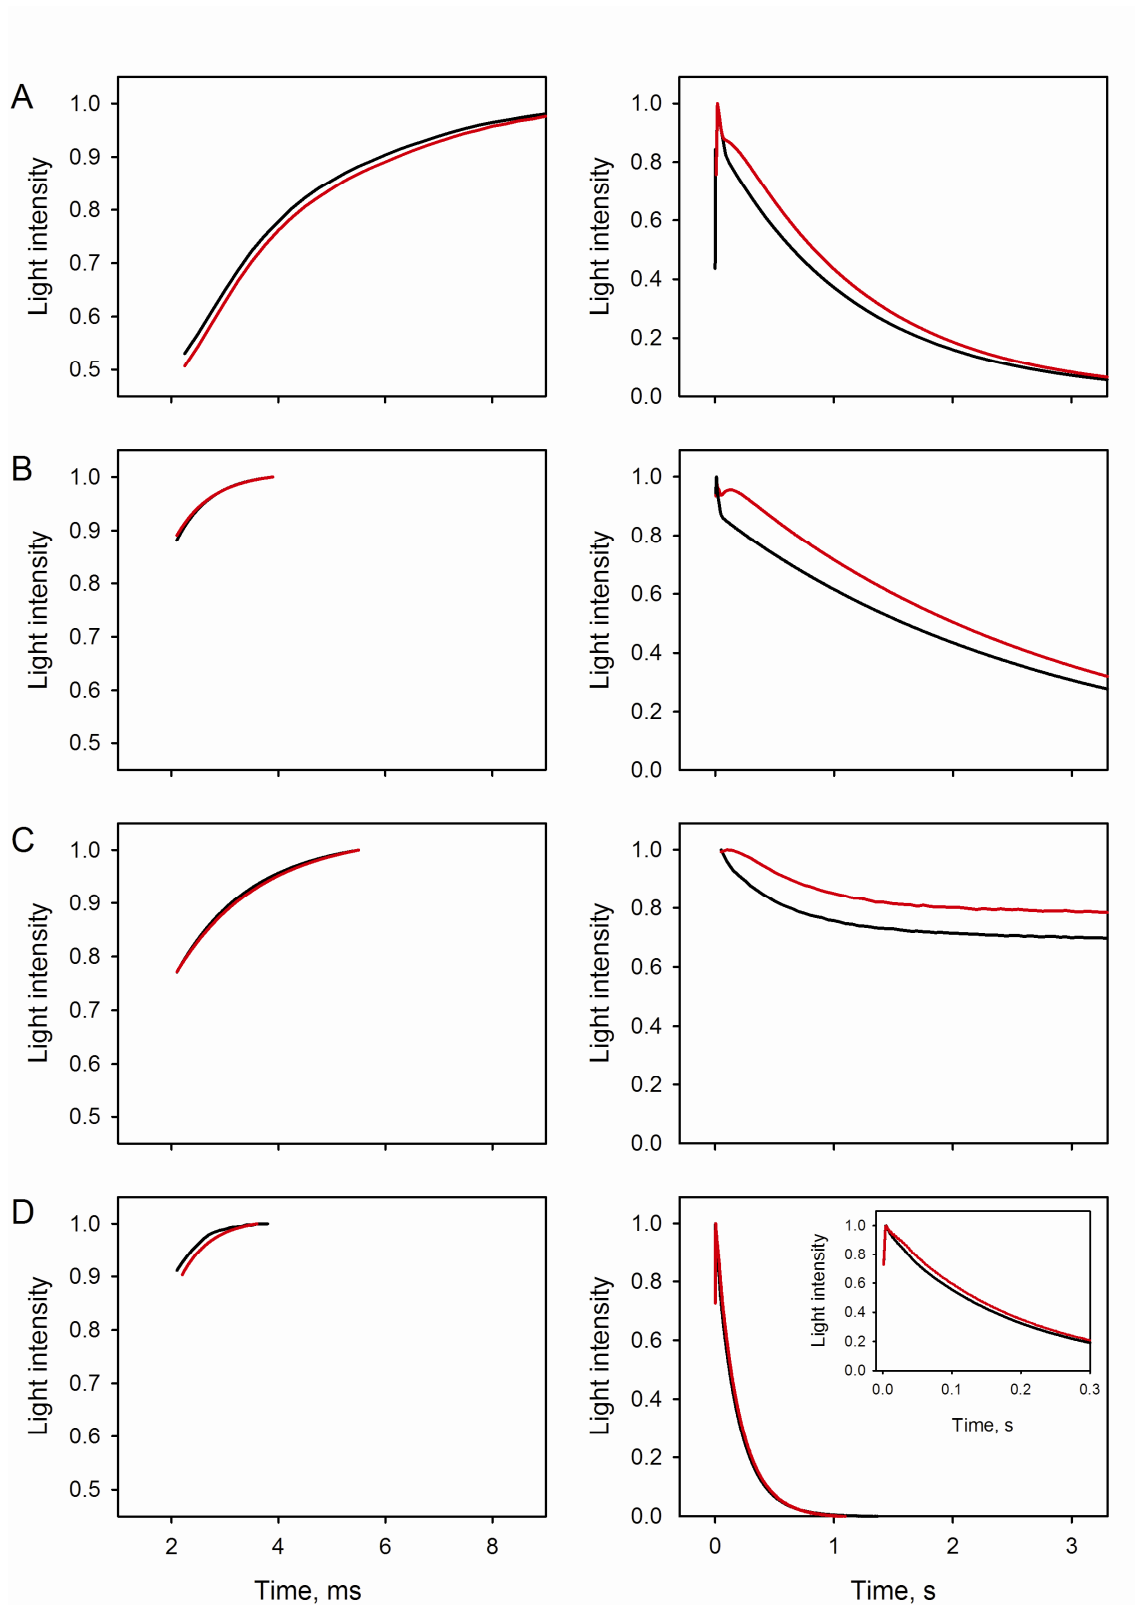

**Figure S3.** Stopped-flow records of the rising phase (left panel) and full-time course (right panel) of luminescence signal for clytin reconstituted with native CTZ (A), CTZ-*f* (B), CTZ-*i* (C), and CTZ-*hcp* (D) without  $Mg^{2+}$  (black) and with 1 mM  $Mg^{2+}$  (red). Inset: Stopped-flow records of the full-time course of luminescence signal for clytin-*hcp* without  $Mg^{2+}$  (black) and with 1 mM  $Mg^{2+}$  (red).
